# Supplementary material for: Aharonov–Bohm oscillations in Dirac semimetal Cd3As2 nanowires
Source: PubMed Central journal article supplement (PMC4766419; doi:10.1038/ncomms10769), 2016-02-23
Supplement: ncomms10769-s1.pdf [file ncomms10769-s1.pdf]

## Supplementary Figures

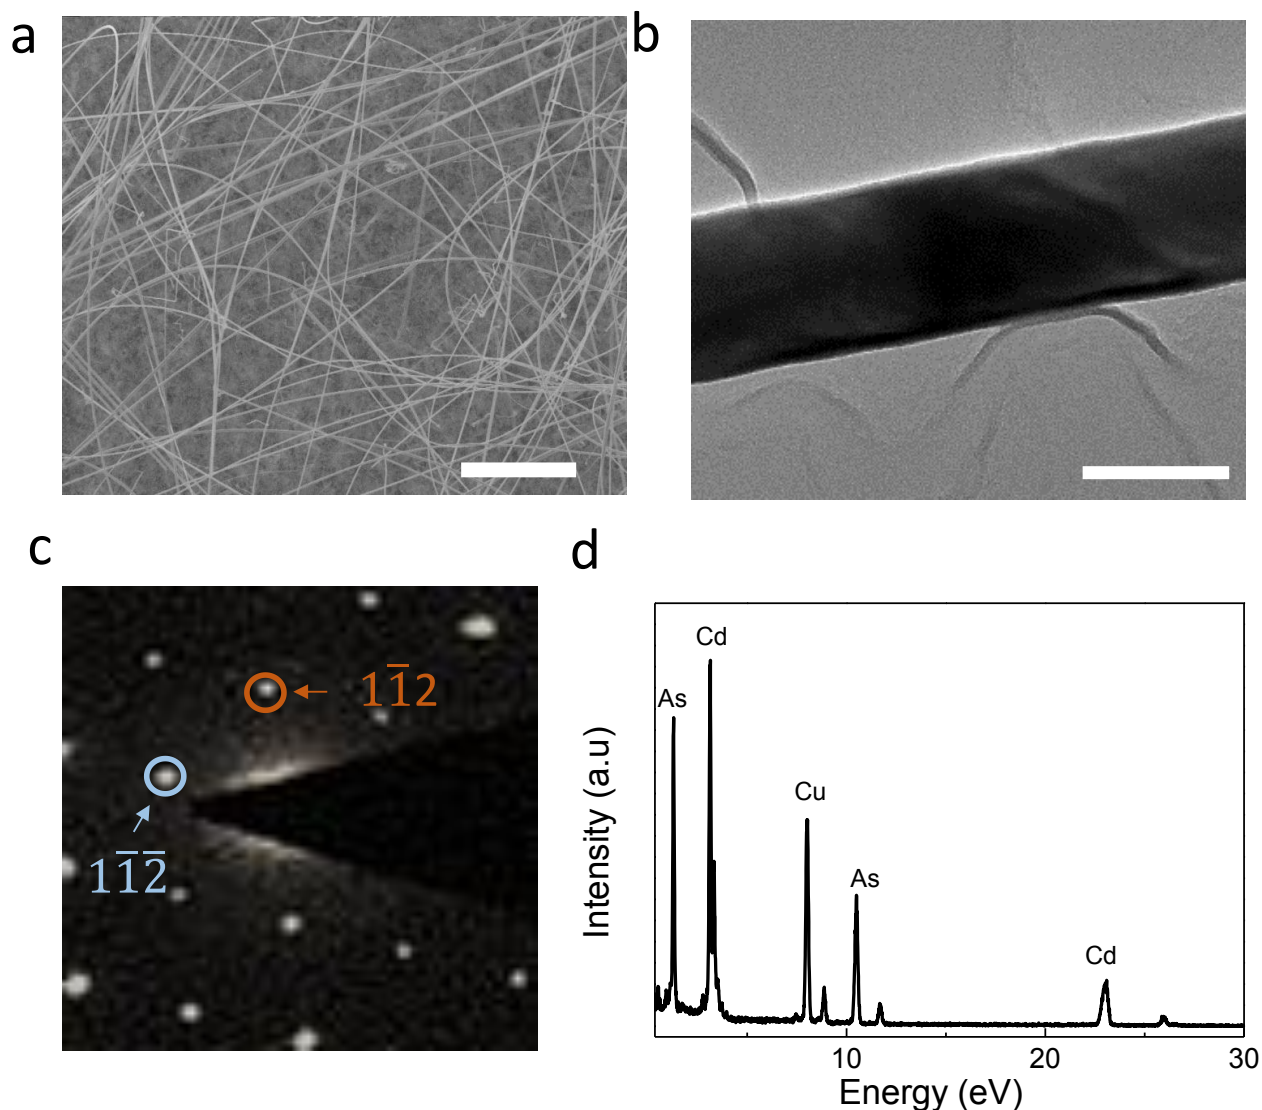

**Supplementary Figure 1 | Characterization of  $\text{Cd}_3\text{As}_2$  nanowires.** (a) SEM image (Scale bar: 20  $\mu\text{m}$ ) and (b) TEM image (Scale bar: 100 nm) of  $\text{Cd}_3\text{As}_2$  nanowires. (c) Typical electron diffraction pattern and (d) the energy-dispersive X-ray spectroscopy (EDS) results of  $\text{Cd}_3\text{As}_2$  nanowires. The as-grown  $\text{Cd}_3\text{As}_2$  nanowires manifest great flexibility. The nanowire diameter is in the range from tens of nanometers to several hundreds of nanometers. The selected electron diffraction pattern in (c) indicates the growth direction is along the  $[112]$  crystalline axis. The EDS results in (d) show the right stoichiometry of the  $\text{Cd}_3\text{As}_2$  compound.

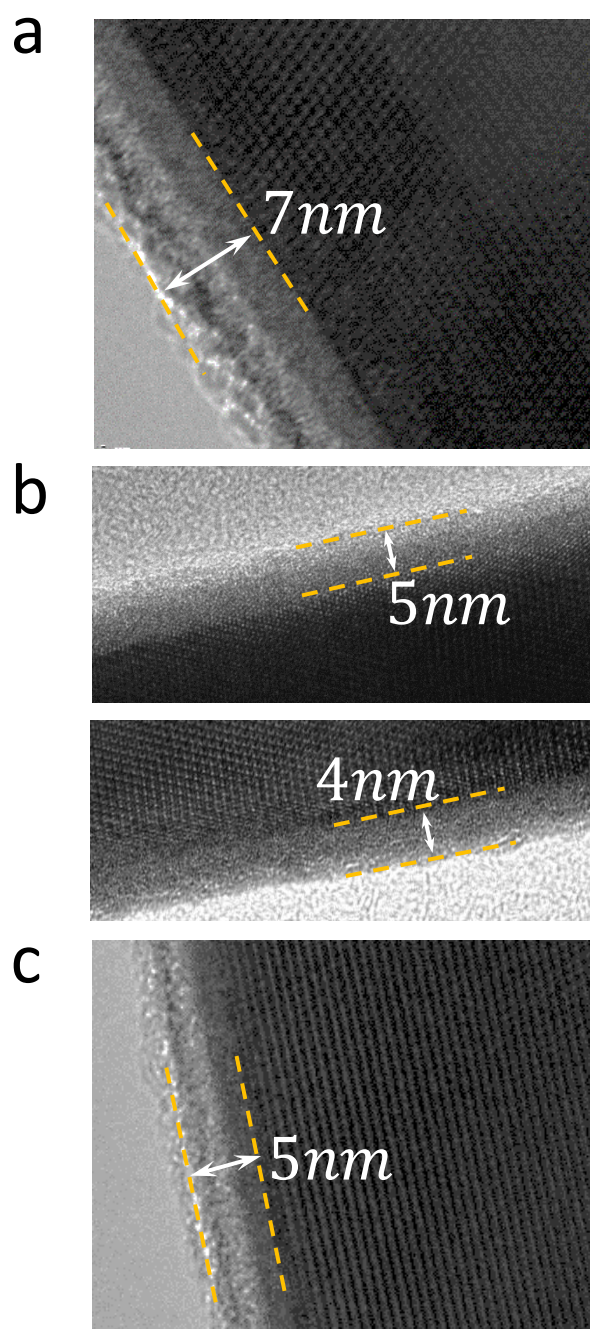

**Supplementary Figure 2 | Amorphous layer on the nanowire surface.** High resolution TEM images of several typical  $\text{Cd}_3\text{As}_2$  nanowires. Amorphous layer on  $\text{Cd}_3\text{As}_2$  nanowires is generally observed in the TEM images, which may be due to the natural oxidation of the surface after exposed in the air.

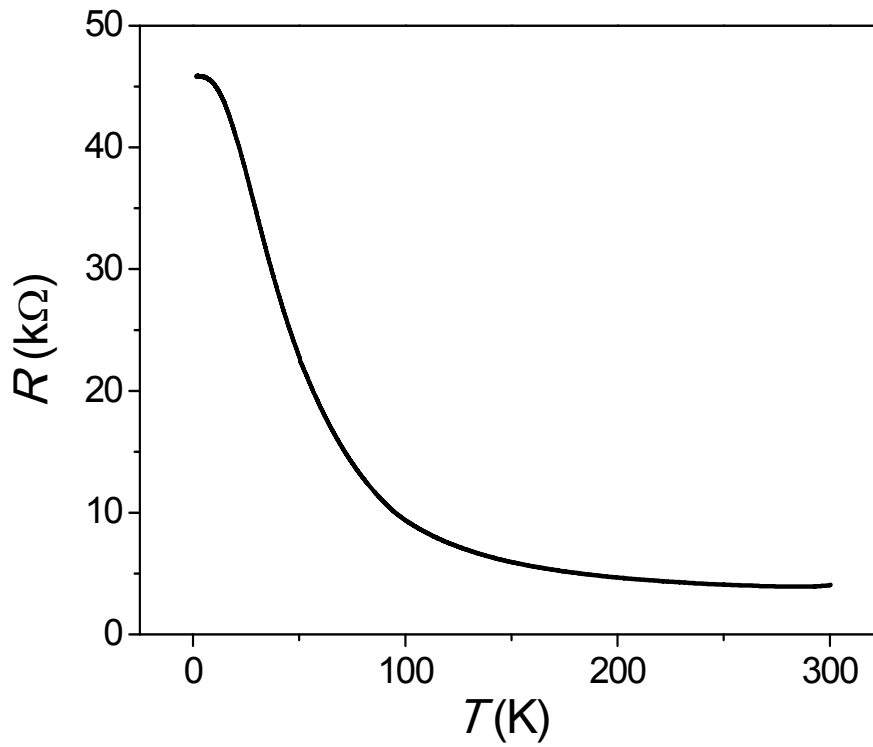

**Supplementary Figure 3 | Resistance as a function of temperature.** The semiconducting-like  $R$ - $T$  behavior indicates that the Fermi level is close to the Dirac point due to the low carrier density of the nanowire. The thermal energy can activate the carriers to enhance the conductance, resulting in the resistance decreasing with increasing temperature.

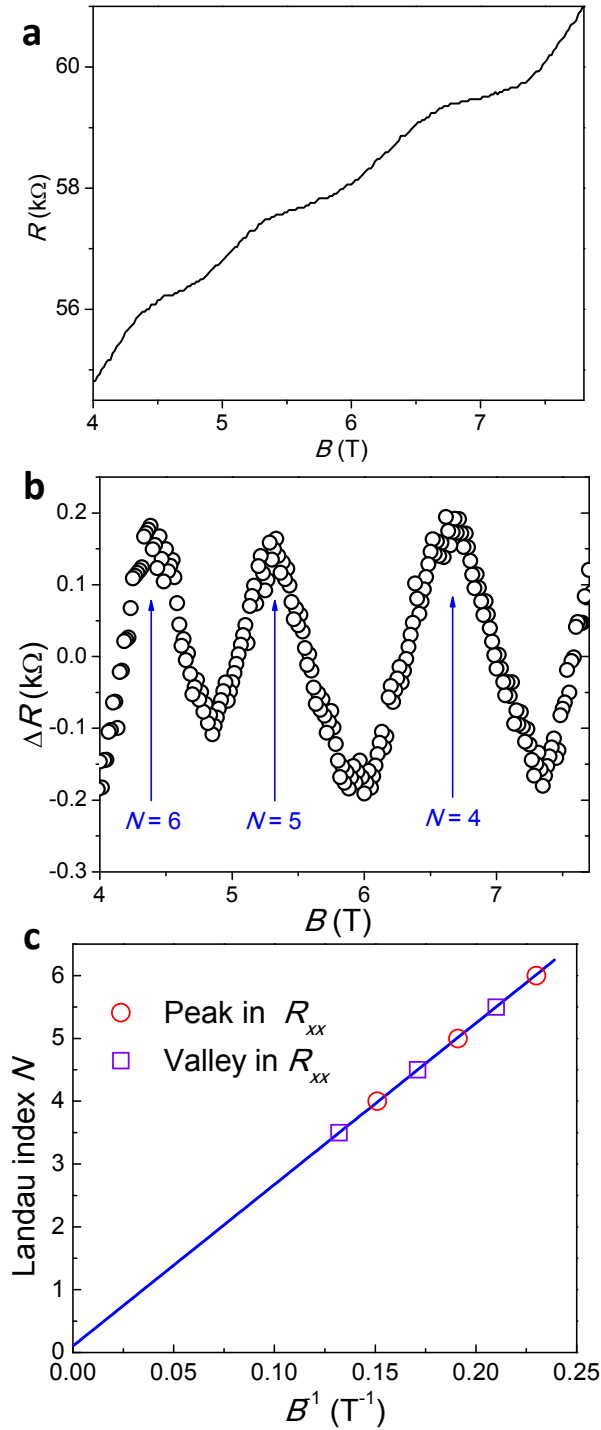

**Supplementary Figure 4 | Shubnikov-de Haas oscillations.** (a) The SdH oscillations in the plot of resistance  $R$  vs. magnetic field  $B$ . (b) Extracted oscillation part  $\Delta R$  as a function of magnetic field  $B$ . (c) Landau index plot by assigning integers to the maxima in  $\Delta R$ , yielding a intercept of 0.1 by the linear extrapolation.

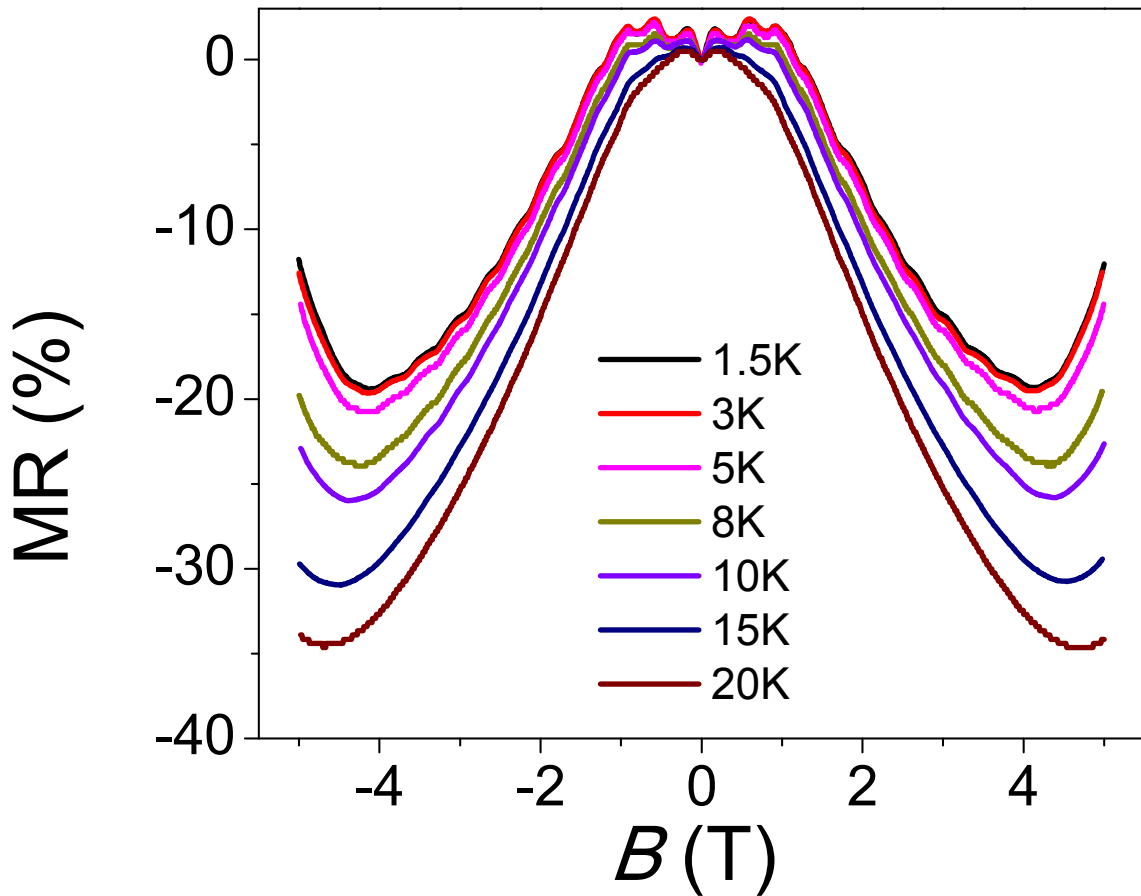

**Supplementary Figure 5 | Negative magnetoresistance.** Magnetoresistance, defined as  $MR = [R(B)/R(0) - 1] \times 100\%$ , of  $Cd_3As_2$  nanowires at variable temperatures in  $B//E$  configuration shows negative values, giving signature of the chiral anomaly effect.

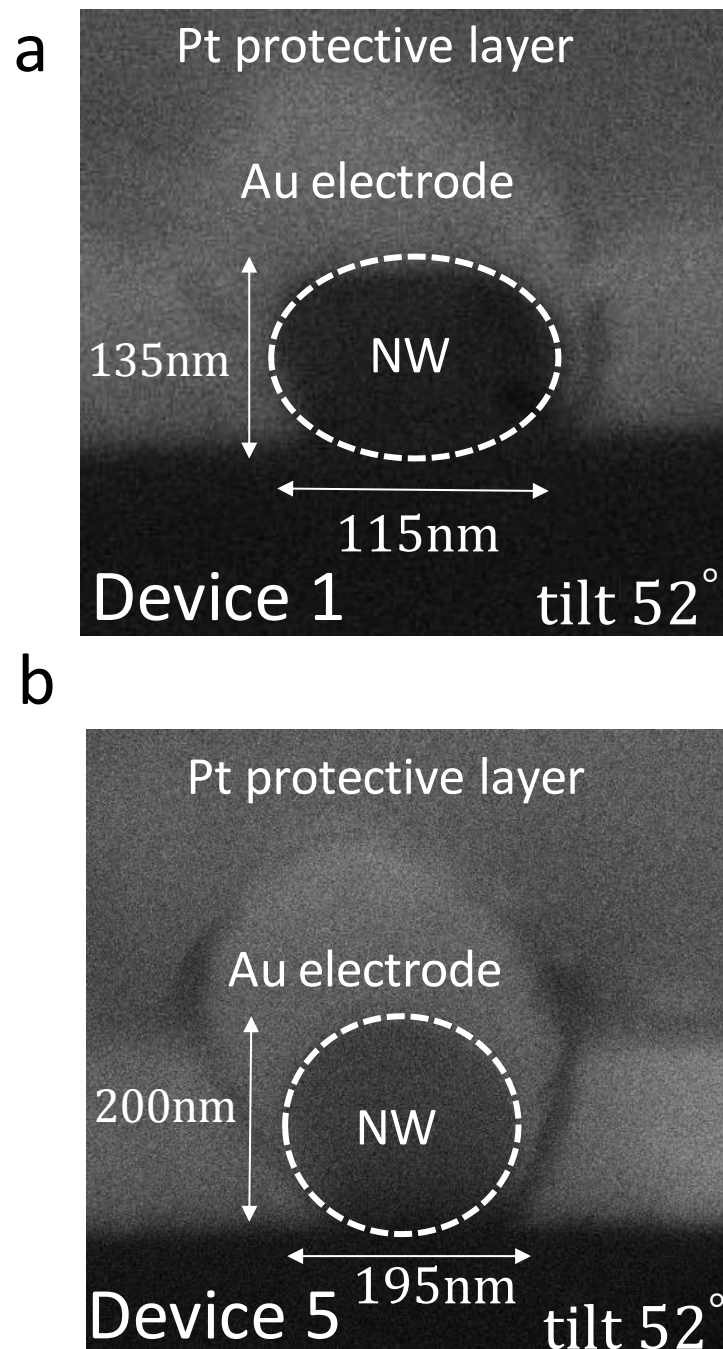

**Supplementary Figure 6 | Cross-section of Devices 1 and 5.** SEM images at tilt angle  $52^\circ$  of nanowire cross-section of (a) Device 1 and (b) Device 5. To acquire the cross-sectional area of the nanowire devices, a thin Pt film was first deposited on the nanowire as a protective layer by electron beam induced deposition method in a dual beam system (Dual-Beam 235-FIB system, FEI Company). Then, the nanowires were cut by focused ion beam.

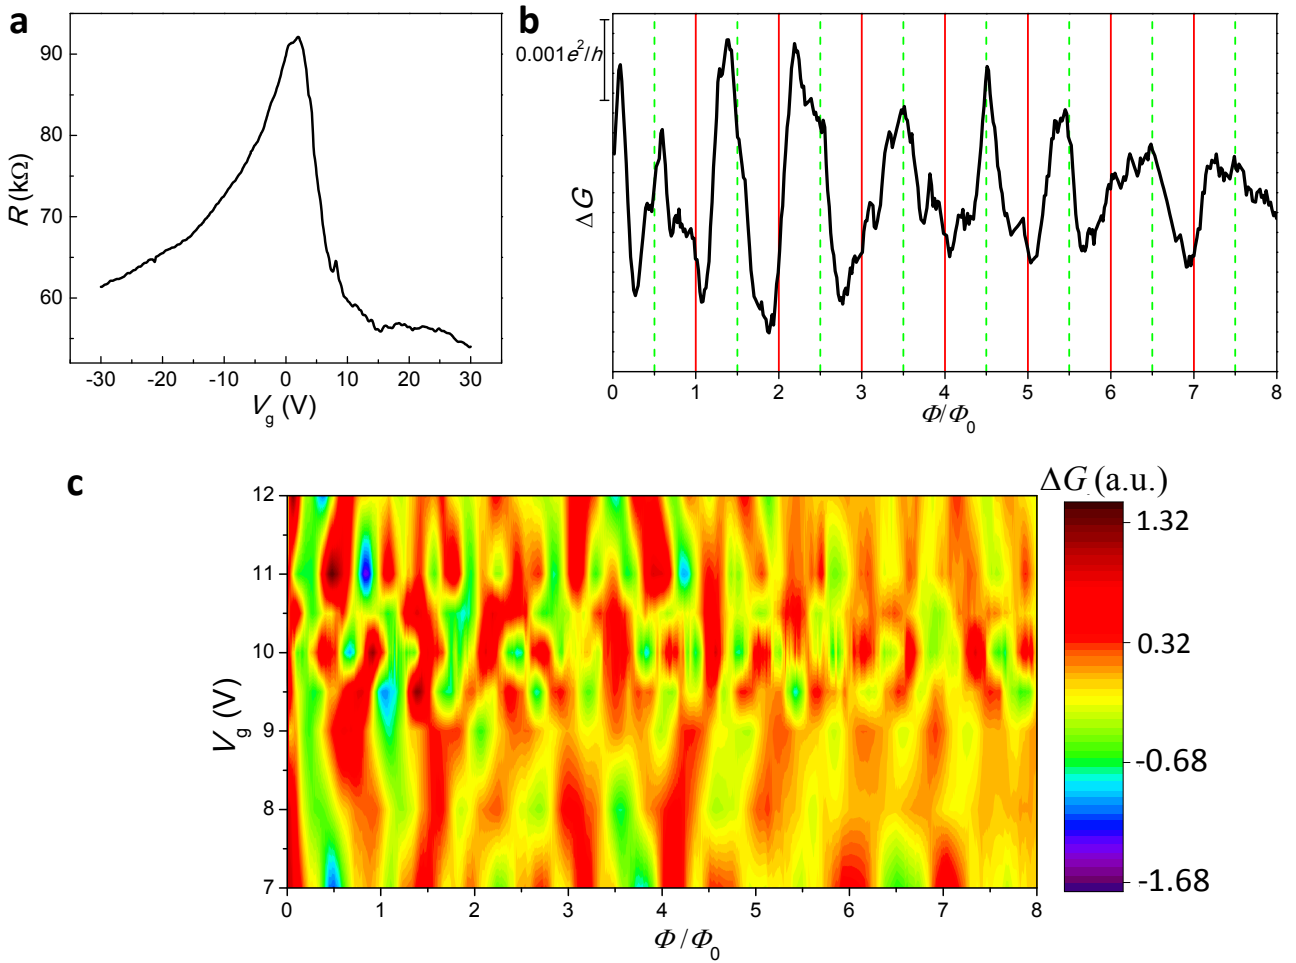

**Supplementary Figure 7 | Gate modulated transport properties of a nanowire with radius of  $\sim 37$  nm (Device 3).** (a) Transfer curve at 1.5 K. (b) Oscillation part  $\Delta G$  as a function of magnetic flux in unit of  $\Phi_0 = h/e$  at  $V_g = 10.5$  V. (c) Mapping of gate-dependent conductance oscillations from  $V_g = 7$  to 12 V with a step of 0.5 V. For comparison, the  $\Delta G$  was normalized.

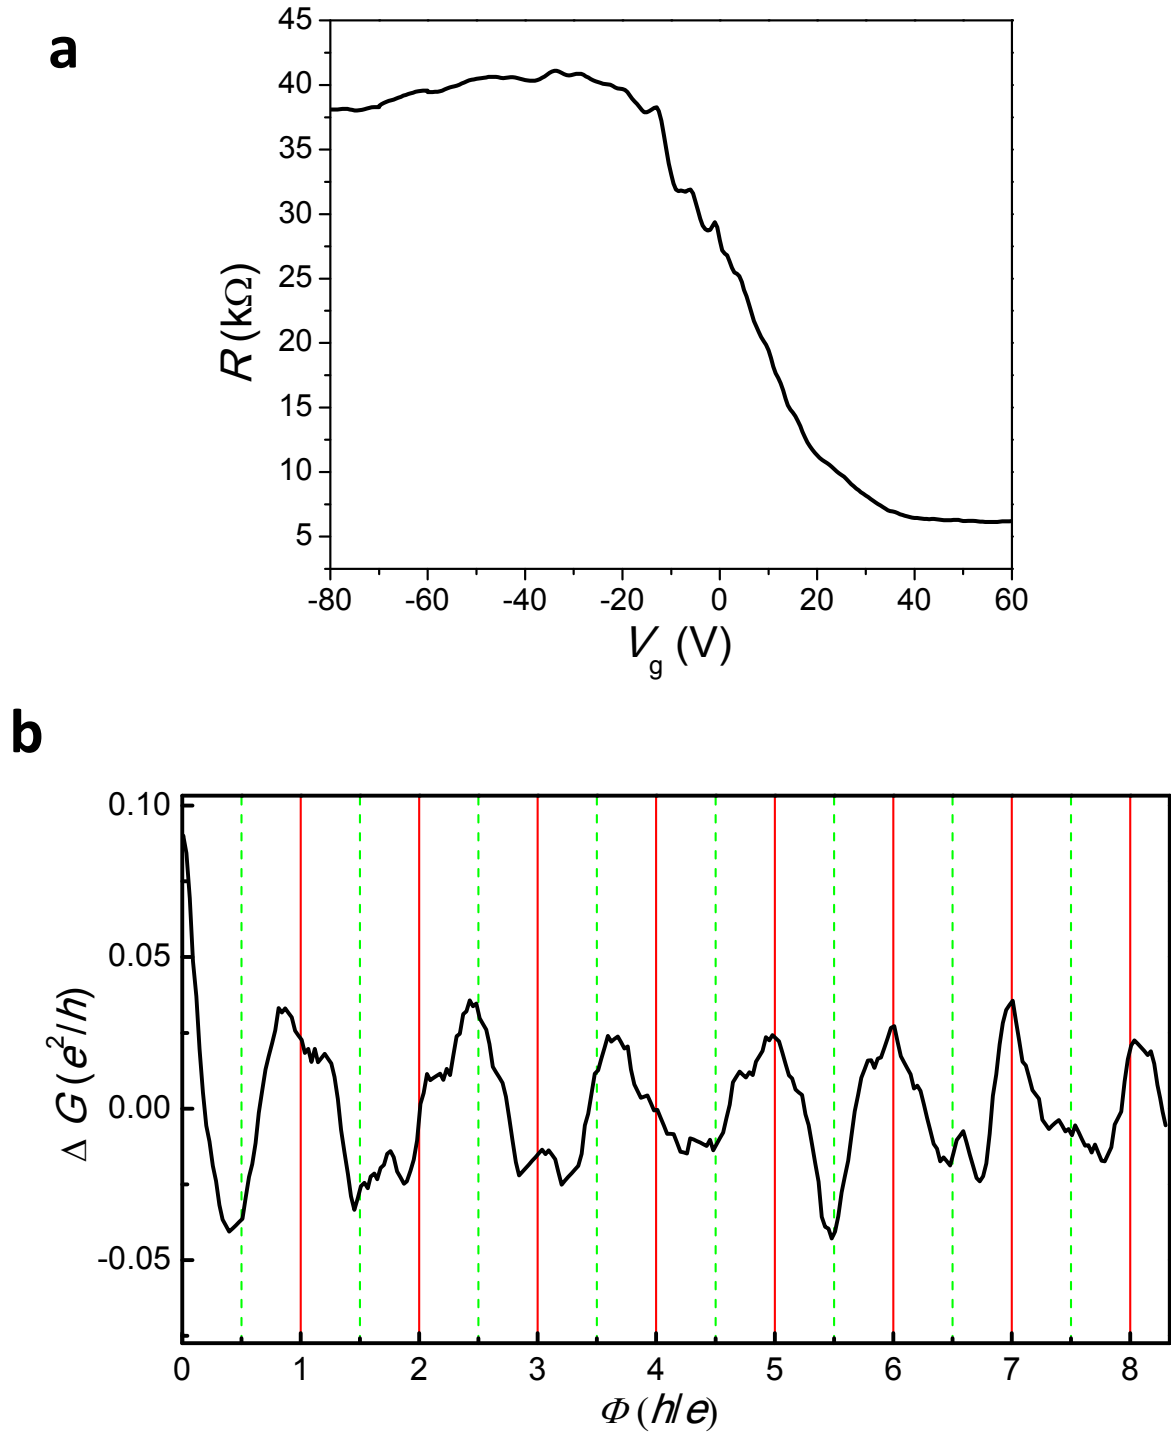

**Supplementary Figure 8 | Gate modulated transport properties of a nanowire with diameter of ~90 nm (Device 4). (a) Resistance as a function of applied gate-voltage  $V_g$  at 1.5 K. (b) A-B oscillations as a function of  $\Phi$  at  $V_g = 60$  V after subtracting the background.**



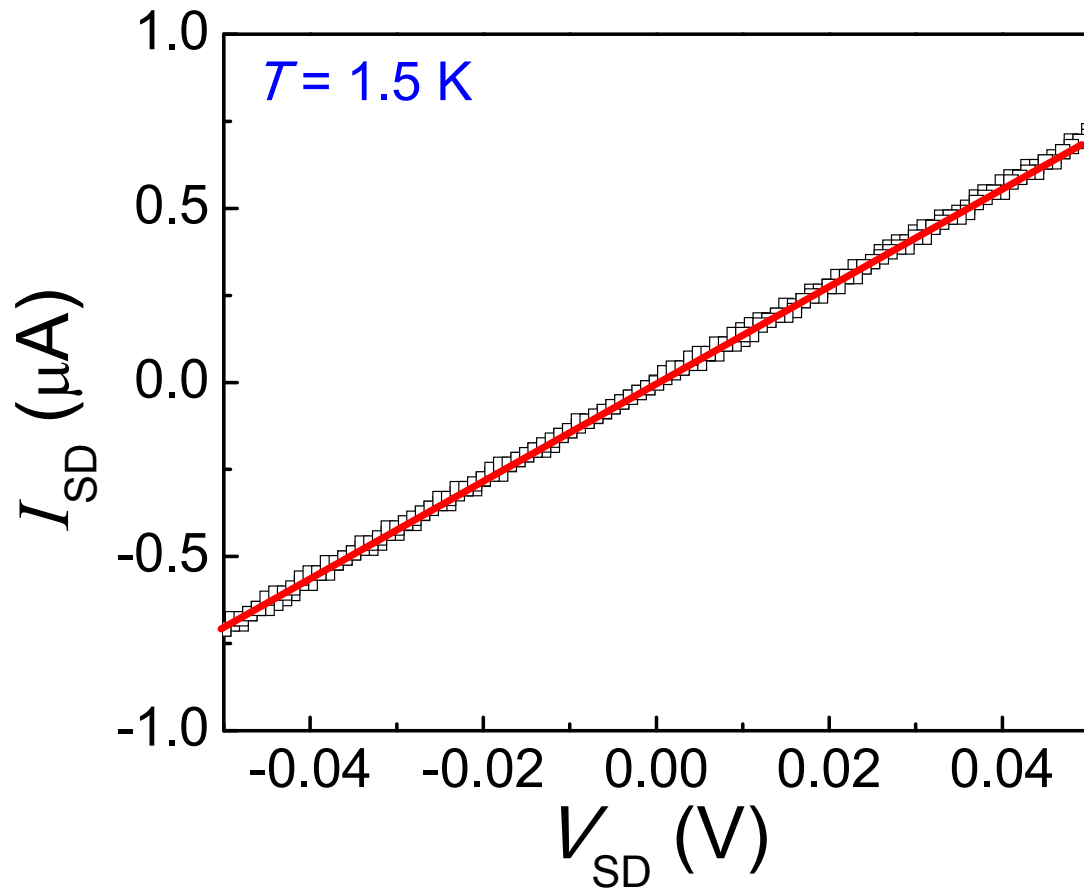

**Supplementary Figure 9 | Current-voltage curve of Device 5 at 1.5 K.** The linear source-drain current  $I_{SD}$  vs. source-drain voltage  $V_{SD}$  curve indicates the Ohmic contacts between Au electrodes and  $Cd_3As_2$  nanowires.
